# Supplementary material for: Aggregation inhibition for graphene oxide nanosheets in polyelectrolyte solutions and assembly of nanocapsules with graphene oxide nanosheets as template
Source: Royal Society of Chemistry journal article supplement (doi:10.1039/c4tb00553h), 2014-01-01
Supplement: c4tb00553h1.pdf [file c4tb00553h1.pdf]

## Electronic Supporting Information

### **Aggregation inhibition for graphene oxide nanosheets in polyelectrolyte solutions and the assembly of nanocapsules with graphene oxide nanosheets as template**

Jing Xin<sup>a</sup>, Renjie Zhang<sup>\*ab</sup>, Wanguo Hou<sup>a</sup>

<sup>a</sup> Key Laboratory of Colloid and Interface Chemistry of the Ministry of Education of the P. R. China, Shandong University, Jinan 250199, P. R. China. Fax: +86-531-88364464; Tel.: +86-531-88366233; E-mail: zhrj@sdu.edu.cn

<sup>b</sup> Key Laboratory of Special Functional Aggregated Materials of the Ministry of Education of the P. R. China, Shandong University, Jinan 250199, P. R. China.

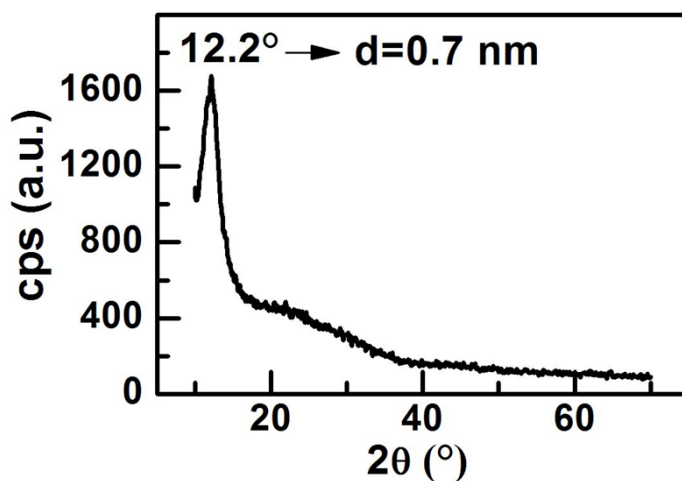

Fig. S1 XRD pattern of GO nanosheets.

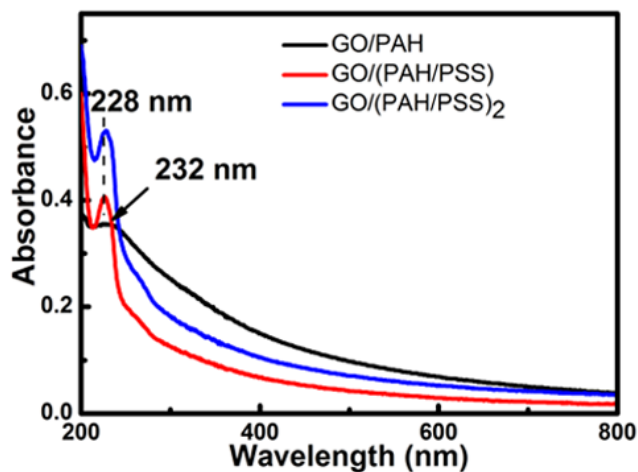

Fig. S2 UV-Vis spectra of GO-templated nanocapsules.

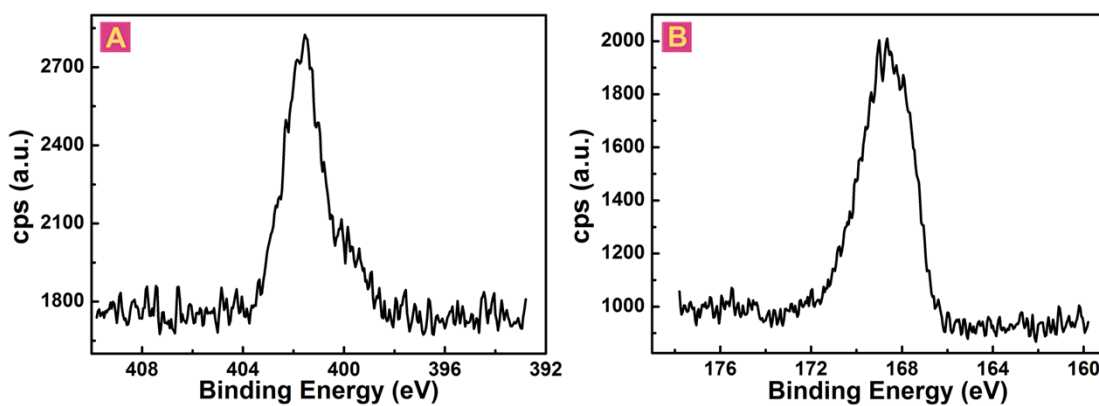

Fig. S3 N 1s (A) and S 2p (B) XPS spectra of GO/(PAH/PSS)<sub>4</sub> nanocapsules.

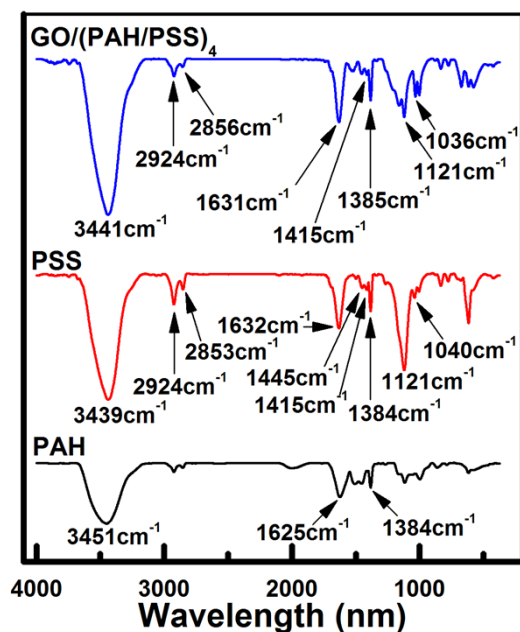

Fig. S4 FTIR spectra of GO/(PAH/PSS)<sub>4</sub> nanocapsules, pure PAH and PSS.

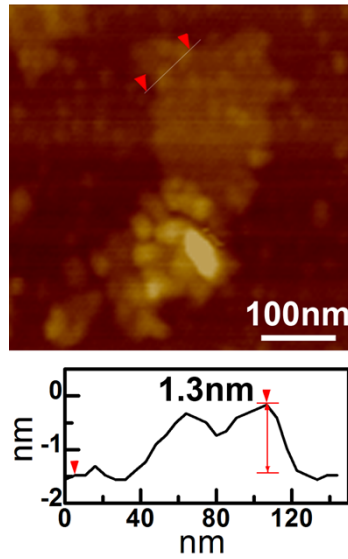

Fig. S5 AFM height image and section analysis of GO+PTX nanosheets.

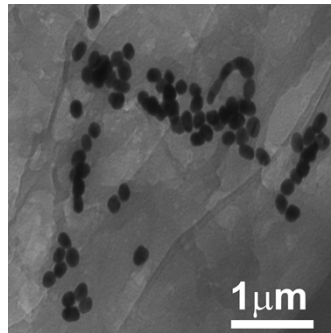

Fig. S6 TEM micrograph of a (GO+PTX)/(PAH/AuNPs)/(PAH/PSS)/PAH nanocapsule.

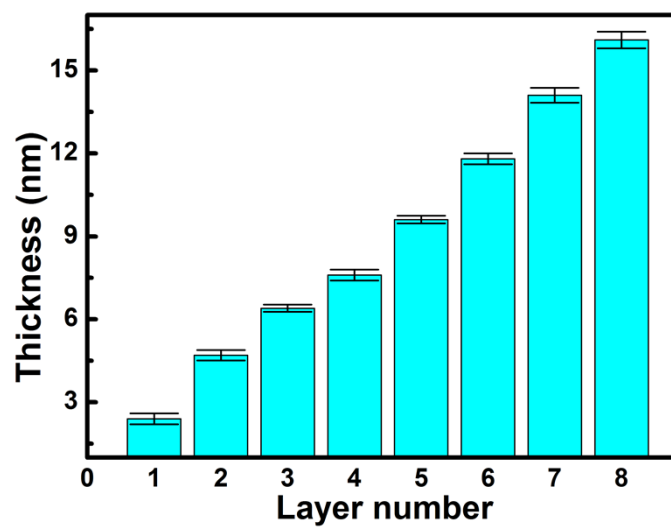

Fig. S7 The thickness increase of each layer in the assembly of GO/(PAH/PSS)<sub>4</sub> nanocapsules.

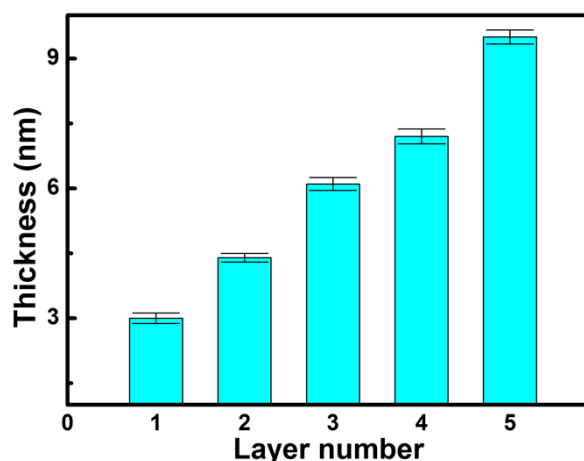

Fig. S8 The thickness increase in the assembly of (GO+PTX)/(PAH/AuNPs)/(PAH/PSS)/PAH nanocapsules.

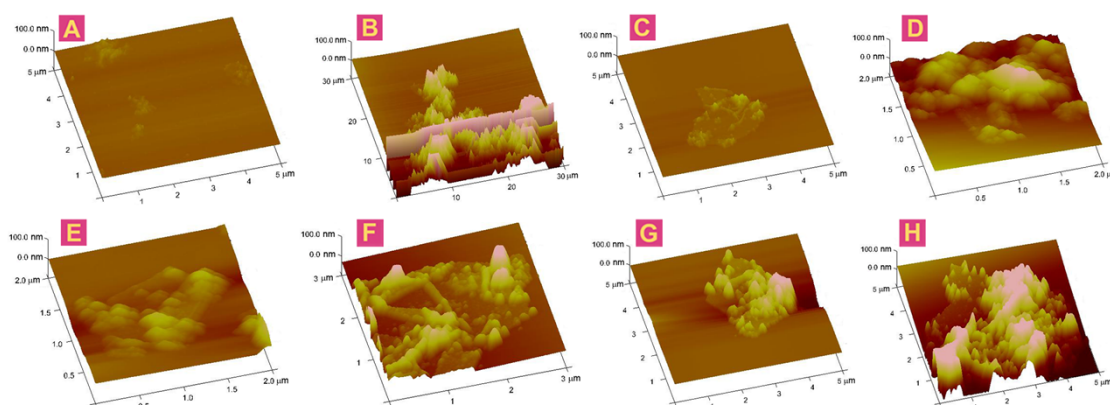

Fig. S9 AFM 3D topographical images of GO-templated nanocapsules of (A) GO/PAH, (B) GO/(PAH/PSS), (C) GO/(PAH/PSS)/PAH, (D) GO/(PAH/PSS)<sub>2</sub>, (E) GO/(PAH/PSS)<sub>2</sub>/PAH, (F) GO/(PAH/PSS)<sub>3</sub>, (G) GO/(PAH/PSS)<sub>3</sub>/PAH, and (H) GO/(PAH/PSS)<sub>4</sub>.

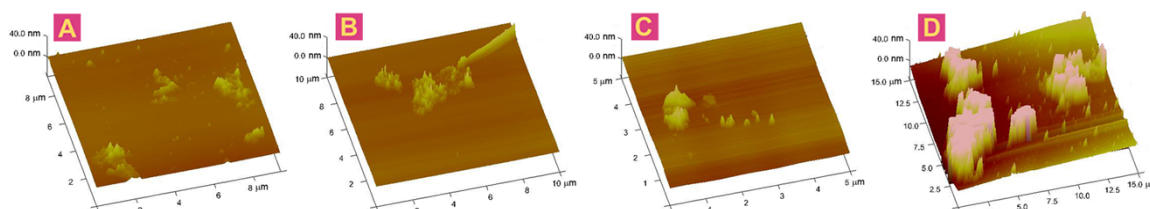

Fig. S10 AFM 3D topographical images of nanocapsules of (A) (GO+PTX)/PAH, (B) (GO+PTX)/(PAH/AuNPs), (C) (GO+PTX)/(PAH/AuNPs)/(PAH/PSS), and (D) (GO+PTX)/(PAH/AuNPs)/(PAH/PSS)/PAH.

Table 1 The average thickness of each layer in the assembly of GO/(PAH/PSS)<sub>4</sub> nanocapsules.

| Layer number | Thickness (nm) |
|--------------|----------------|
| 1            | 2.4            |
| 2            | 4.7            |
| 3            | 6.4            |
| 4            | 7.6            |
| 5            | 9.6            |
| 6            | 11.8           |
| 7            | 14.1           |
| 8            | 16.1           |

Table 2 The average thickness of each layer in the assembly of (GO+PTX)/(PAH/AuNPs)/(PAH/PSS)/PAH nanocapsules.

| Layer number | Thickness (nm) |
|--------------|----------------|
| 1            | 3.0            |
| 2            | 4.4            |
| 3            | 6.1            |
| 4            | 7.2            |
| 5            | 9.5            |
